# Supplementary material for: The Effect of Exercise Training on Mediators of Inflammation in Breast Cancer Survivors: A Systematic Review with Meta-analysis
Source: Oxford University Press journal article supplement (doi:10.1158/1055-9965.epi-15-1061), 2016-04-12
Supplement: 10559965epi151061-sup-156525_1_data_0_c4gkng.docx [file 10559965epi151061-sup-156525_1_data_0_c4gkng.docx]

**Supplementary figure 1.** Effects of exercise on TNF-α in breast cancer survivors

**Supplementary figure 2.** Effects of exercise on IL-8 in breast cancer survivors

**Supplementary figure 3.** Effects of exercise on IL-2 in breast cancer survivors

**Supplementary figure 4.** Effects of exercise on CRP in breast cancer survivors

**Supplementary figure 5.** Effects of exercise on IL-10 in breast cancer survivors

**Supplementary figure 6.** Funnel plot for the assessment of publication bias

**Supplementary Table 1. Meta-analyses of the effects of exercise on individual inflammatory markers, with subgroup analyses by mode of exercise.**

Meta-analyses of the effects of exercise on individual inflammatory markers, with subgroup analyses by mode of exercise.
